# Supplementary material for: Folic acid-functionalized magnetic nanoprobes via a PAMAM dendrimer/SA-biotin mediated cascade-amplifying system for the efficient enrichment of circulating tumor cells
Source: Royal Society of Chemistry journal article supplement (doi:10.1039/d0bm01212b), 2020-01-01
Supplement: d0bm01212b1.pdf [file d0bm01212b1.pdf]

## **Supplementary Materials**

### **Folic acid-functionalized magnetic nanoprobe via PAMAM dendrimers/SA-biotin mediated cascade amplifying system for efficient enrichment of circulating tumor cells**

Xiangyu Meng<sup>a</sup>, Pingfeng Sun<sup>b</sup>, Hengyi Xu<sup>c,\*</sup>, Zhifei Wang<sup>a,\*</sup>

a School of Chemistry and Chemical Engineering, Southeast University, Nanjing 211189, Jiangsu, PR China

b Jiangxi Maternal and Child Health Hospital, Nanchang 330000, Jiangxi, PR China

c State Key Laboratory of Food Science and Technology, Nanchang University, Nanchang, 330047, Jiangxi, PR China

**\* Corresponding author:**

Hengyi Xu, e-mail address: HengyiXu@ncu.edu.cn

Zhifei Wang, e-mail address: zfwang@seu.edu.cn

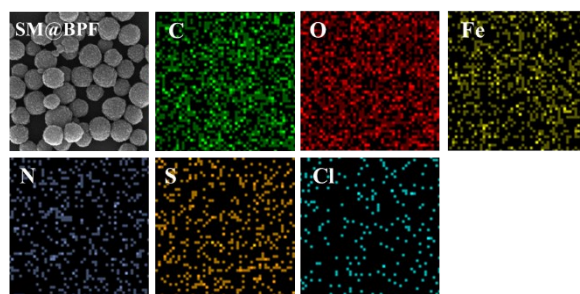

**Fig. S1.** The relative element mapping of SM@BPF by SEM analysis.

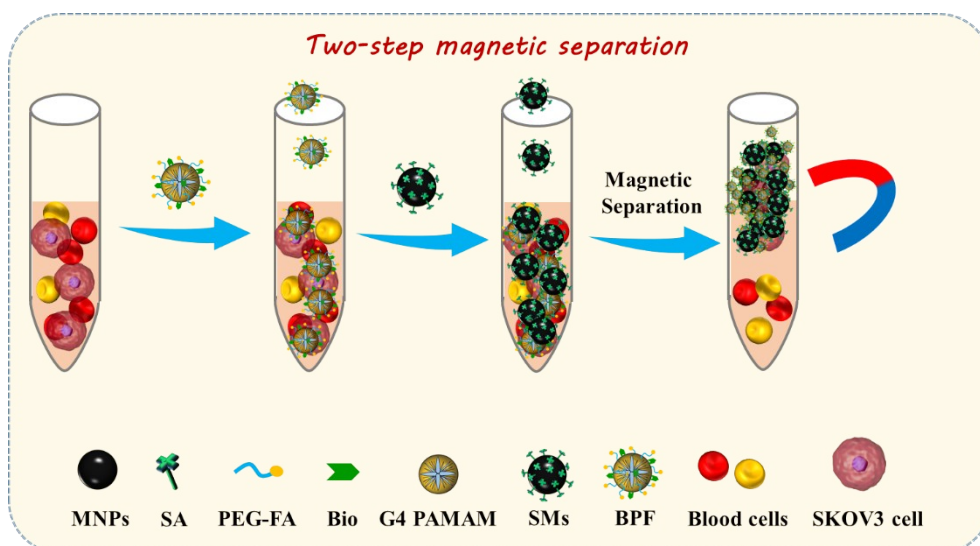

**Fig. S2.** The preparation process of SMs and BPF, and the schematic diagram for CTCs separating in blood via two-step binding strategy.

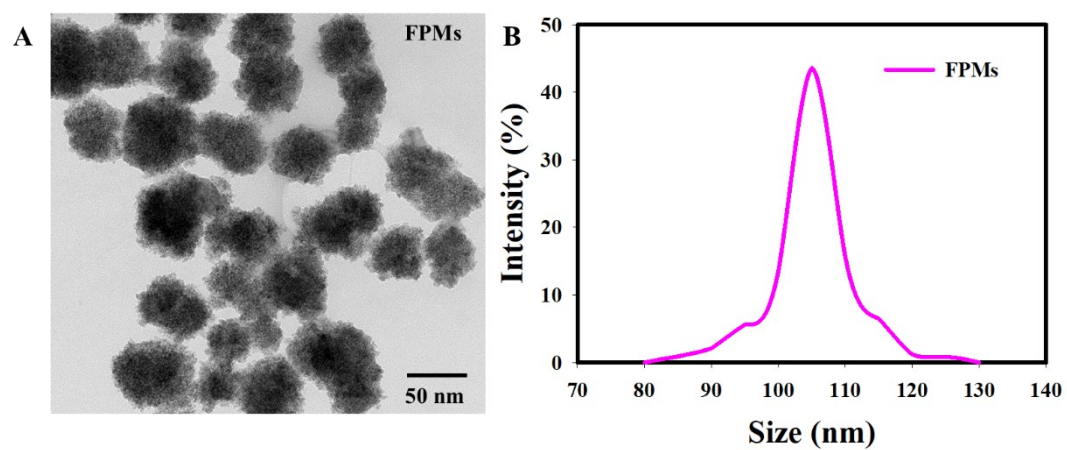

**Fig. S3.** TEM image (A) and hydrodynamic size (B) of FPMs.

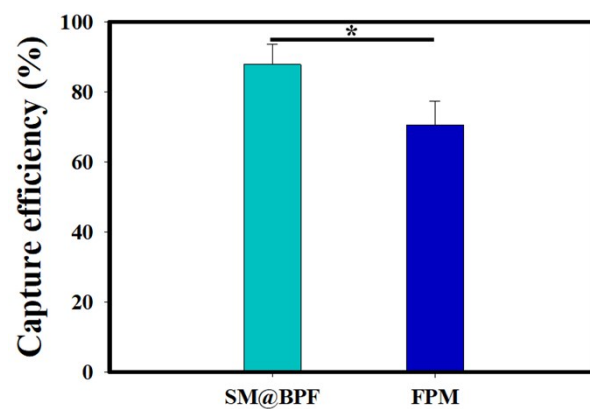

**Fig. S4.** Capture efficiency of SKOV3 by SM@BPF and FA-PAMAM-MNPs (FPM).

\*\*\* $p < 0.001$ , \*\* $p < 0.01$ , or \* $p < 0.05$ . Error bars indicate standard deviation ( $n = 3$ ).

**Table S1** Comparison of the current magnetic separation technique for CTC enrichment and detection.

| Nanoplatfrom                                | Probe                      | Sample      | Capture efficiency | Cell viability | Cancer cells               | Detection method            | Ref.       |
|---------------------------------------------|----------------------------|-------------|--------------------|----------------|----------------------------|-----------------------------|------------|
| Ab-silane-coated MNPs                       | anti-HER2 antibody         | Whole blood | 84%                | /              | SK-BR-3 cells              | /                           | 1          |
| MNPs-Ab                                     | anti-MCSP antibody         | PBS         | 70.2%              | /              | LM-MEL-33 cells            | colorimetric detection      | 2          |
| Ab@Lipo-MNP-GO                              | anti-EpCAM antibody        | Whole blood | ~68%               | viable         | HCT-116 cells              | Immunofluorescence staining | 3          |
| Tf-PEG-b-AGE coated IONPs                   | Transferrin (Tf)           | Whole blood | 58.7 ± 6.4%        | 89%            | D556 Medulloblastoma cells | /                           | 4          |
| UCNP-Apt-Biotin and IONPs-Av                | Aptamer                    | PBS         | 80%-90%            | /              | CCRF-CEM cells             | CCK4-based ICC              | 5          |
| Apt-MBs                                     | aptamer                    | Whole blood | 55 %               | /              | DLD-1 cells                | SERS imaging                | 6          |
| Fe <sub>3</sub> O <sub>4</sub> @HA capsules | FA and anti-EpCAM antibody | Whole blood | 88%                | viable         | MCF-7 cells                | three-color ICC             | 7          |
| MNPs-FA                                     | FA                         | Whole blood | 61.3%              | viable         | SKOV3 cells                | HE4-based ICC               | 8          |
| FA-BSA-MNP                                  | FA                         | Whole blood | 61.3%              | 92.7%          | SKOV3 cells                | HE4-based ICC               | 9          |
| MNPs-SA and biotin-BSA-FA                   | FA                         | Whole blood | 80%                | viable         | SKOV3 cells                | HE4-based ICC               | 10         |
| SM@BPF                                      | FA                         | Whole blood | 79.6%              | 93.2%          | SKOV3 cells                | HE4-based ICC               | This study |

## References

- [1] Haghighi AH, Faghih Z, Khorasani MT, Farjadian F. Antibody conjugated onto surface modified magnetic nanoparticles for separation of HER2+ breast cancer cells. *J.Magn. Magn. Mater.* 2019, **490**, 165479-165489.
- [2] Li J, Wang J, Wang Y, Trau M. Simple and rapid colorimetric detection of melanoma circulating tumor cells using bifunctional magnetic nanoparticles. *Analyst* 2017, **142**, 4788-4793.
- [3] Lai C H, Tsai W S, Yang M H, Chou T Y, Chang Y C. A two-dimensional immunomagnetic nano-net for the efficient isolation of circulating tumor cells in whole blood. *Nanoscale* 2019, **11**, 21119-21127.

- [4] Lin R, Li Y, MacDonald T, Wu H, Provenziale J, Peng X, et al. Improving sensitivity and specificity of capturing and detecting targeted cancer cells with anti-biofouling polymer coated magnetic iron oxide nanoparticles. *Colloids Surface. B.* 2017, **150**, 261-270.
- [5] Fang S, Wang C, Xiang J, Cheng L, Song X, Xu L, et al. Aptamer-conjugated upconversion nanoprobe assisted by magnetic separation for effective isolation and sensitive detection of circulating tumor cells. *Nano Res.* 2014, **7**, 1327-1336.
- [6] Sun C, Zhang R, Gao M, Zhang X. A rapid and simple method for efficient capture and accurate discrimination of circulating tumor cells using aptamer conjugated magnetic beads and surface-enhanced Raman scattering imaging. *Anal. Bioanal. Chem.* 2015, **407**, 8883-8892.
- [7] Ma S, Zhou X, Chen Q, Jiang P, Lan F, Yi Q, et al. Multi-targeting magnetic hyaluronan capsules efficiently capturing circulating tumor cells. *J. Colloid Inter. Sci.* 2019, **545**, 94-103.
- [8] Liu W, Nie L, Li F, Aguilar ZP, Xu H, Xiong Y, et al. Folic acid conjugated magnetic iron oxide nanoparticles for nondestructive separation and detection of ovarian cancer cells from whole blood. *Biomater. Sci.* 2016, **4**, 159-166.
- [9] Li F, Yang G, Aguilar ZP, Xiong Y, Xu H. Affordable and simple method for separating and detecting ovarian cancer circulating tumor cells using BSA coated magnetic nanoprobe modified with folic acid. *Sensors Actuat. B-Chem.* 2018, **262**, 611-618.
- [10] Nie L, Li F, Huang X, Aguilar ZP, Wang YA, Xiong Y, et al. Folic acid targeting for efficient isolation and detection of ovarian cancer CTCs from human whole blood based on two-step binding strategy. *ACS Appl. Mater. Inter.* 2018, **10**, 14055-14062.

**Table S2** Numbers of identified CTCs from ovarian patients and normal female blood samples.

| Sample (No.) | Sample volume (mL) | Numbers of identified CTC |
|--------------|--------------------|---------------------------|
| 1            | 1.0                | 7                         |
| 2            | 1.0                | 3                         |
| 3            | 1.0                | 11                        |
| 4            | 1.1                | 5                         |
| 5            | 1.0                | 2                         |
| 6            | 1.0                | 6                         |
| 7            | 1.1                | 4                         |
| 8            | 1.0                | 2                         |
| 9            | 1.0                | 3                         |
| 10-20        | 1.0                | 0                         |

No: number.
